# Supplementary material for: Aberrant mesenchymal differentiation of glioma stem-like cells: implications for therapeutic targeting
Source: PubMed Central journal article supplement (PMC4741584; doi:10.18632/oncotarget.5219), 2015-08-19
Supplement: oncotarget-06-31007-s001.pdf [file oncotarget-06-31007-s001.pdf]

# Aberrant mesenchymal differentiation of glioma stem-like cells: implications for therapeutic targeting

## Supplementary Material

A.

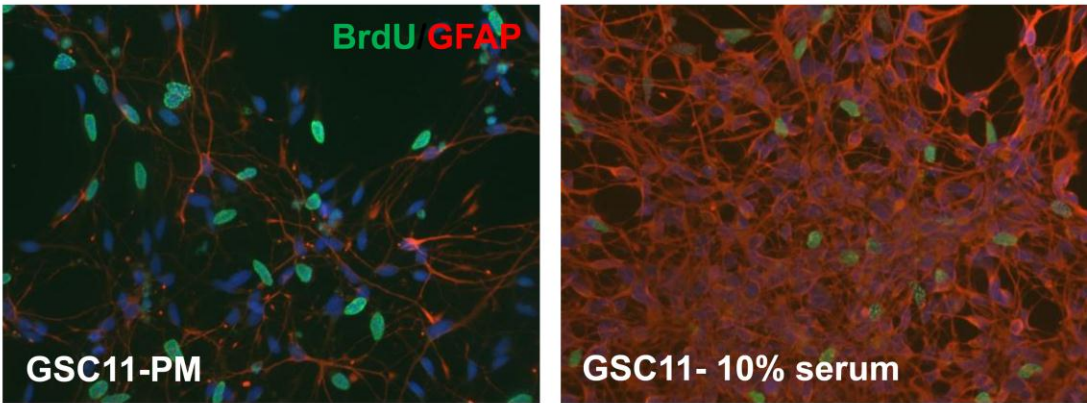

B.

| GSC    | # of cells | Treatment     | # of animals | Median survival (days) | Logrank vs. Control (p-value) |
|--------|------------|---------------|--------------|------------------------|-------------------------------|
| GSC 23 | 200,000    | Control       | 4            | 70                     |                               |
|        |            | Retinoic acid | 4            | 67                     | 0.31                          |
|        |            | 10% serum     | 4            | 64                     | 1.00                          |
|        | 20,000     | Control       | 4            | 78.5                   |                               |
|        |            | Retinoic acid | 4            | 83.5                   | 0.38                          |
|        |            | 10% serum     | 4            | 76.5                   | 0.67                          |
| GSC 11 | 200,000    | Control       | 4            | 48.5                   |                               |
|        |            | Retinoic acid | 4            | 43.5                   | 0.01                          |
|        |            | 10% serum     | 4            | 49                     | 0.42                          |
|        | 20,000     | Control       | 4            | 66.5                   |                               |
|        |            | Retinoic acid | 4            | 63                     | 0.81                          |
|        |            | 10% serum     | 4            | 72.5                   | 0.26                          |

C.

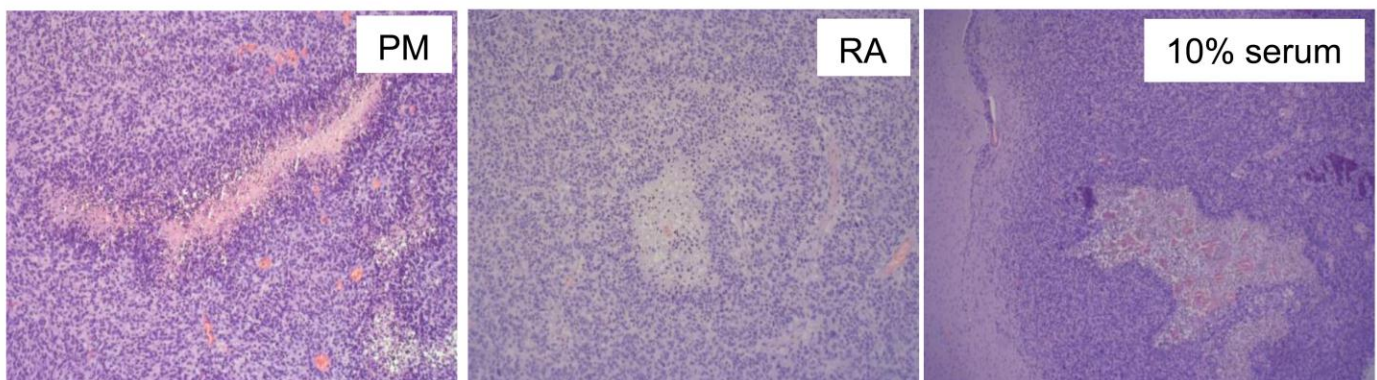

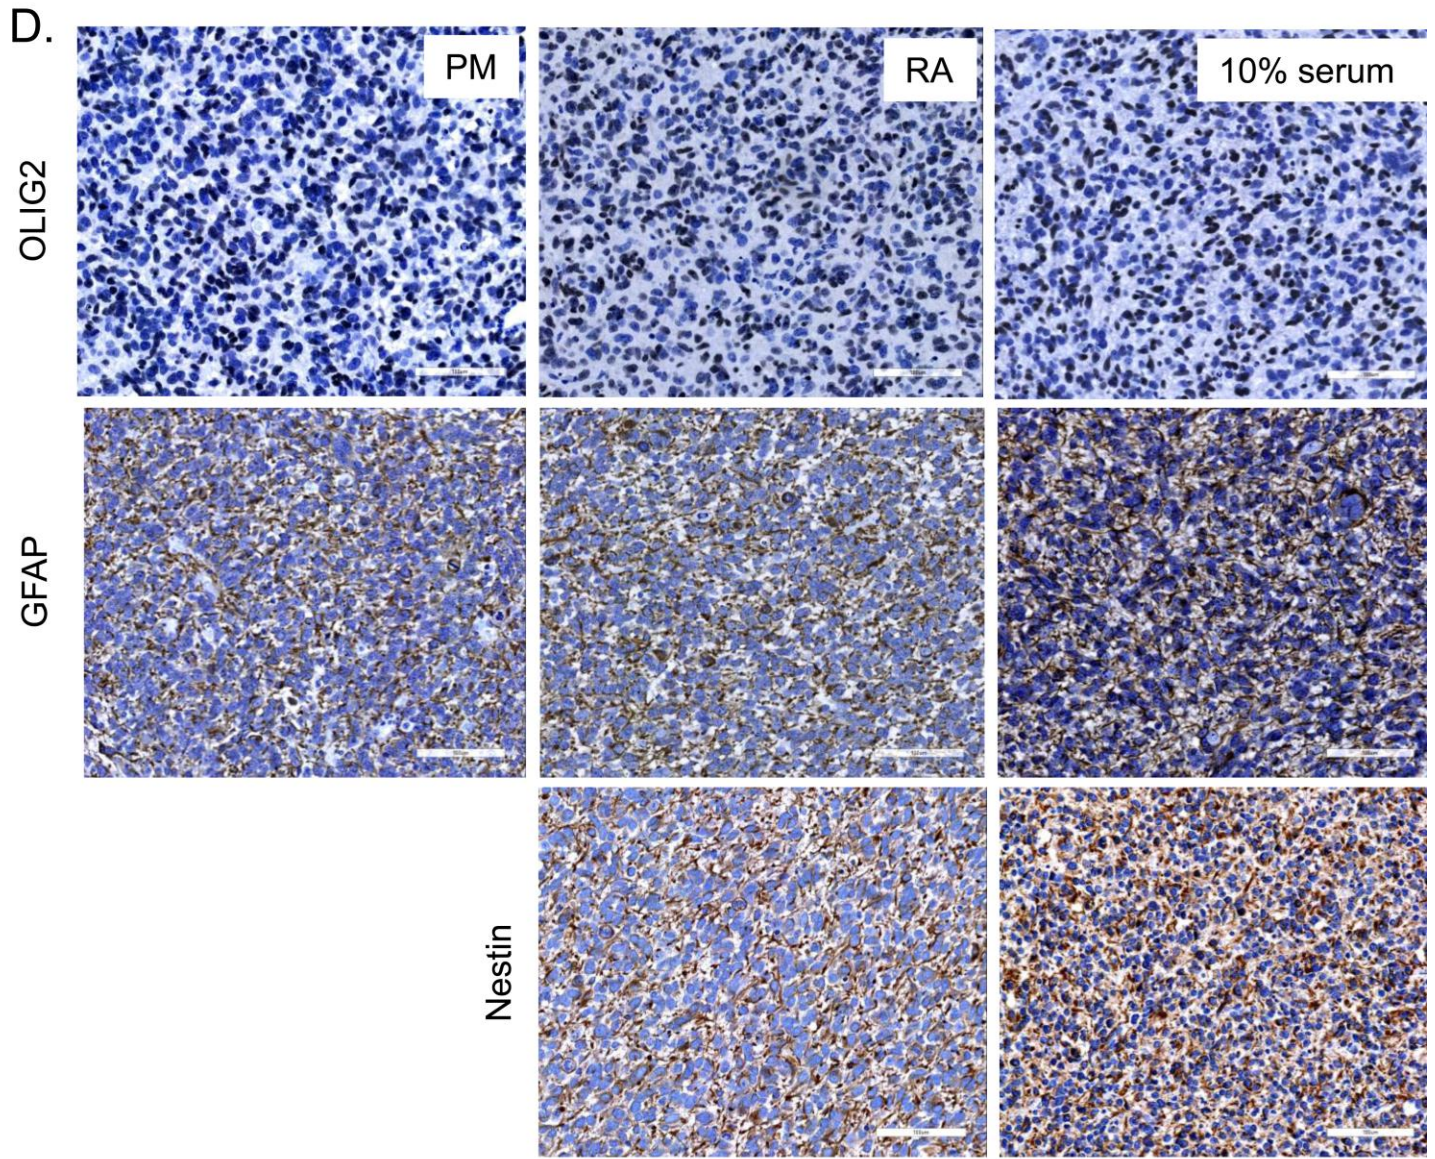

**Supplementary Figure 1: A.** Representative immunofluorescent images of BrdU (green) and GFAP (red) in GSC1 cultured under various conditions. **B.** Survival analysis of animals implanted with  $2 \times 10^4$  and  $20 \times 10^4$  cells after exposure to retinoic acid or 10% serum. *p* values were determined by log rank test. **C.** Hematoxylin and eosin staining of xenograft tumors derived from GSCs subject to various differentiation conditions. **D.** Representative IHC images of GSC xenografts are shown. Scale bar = 100  $\mu$ M.
